# Supplementary material for: Effects of Mars Global Simulant (MGS-1) on Growth and Physiology of Sweet Potato: A Space Model Plant
Source: Preprints.org preprint supplement (doi:10.20944/preprints202311.0979.v1), 2023-11-15
Supplement: Supplementary file 1 [file supplementary]

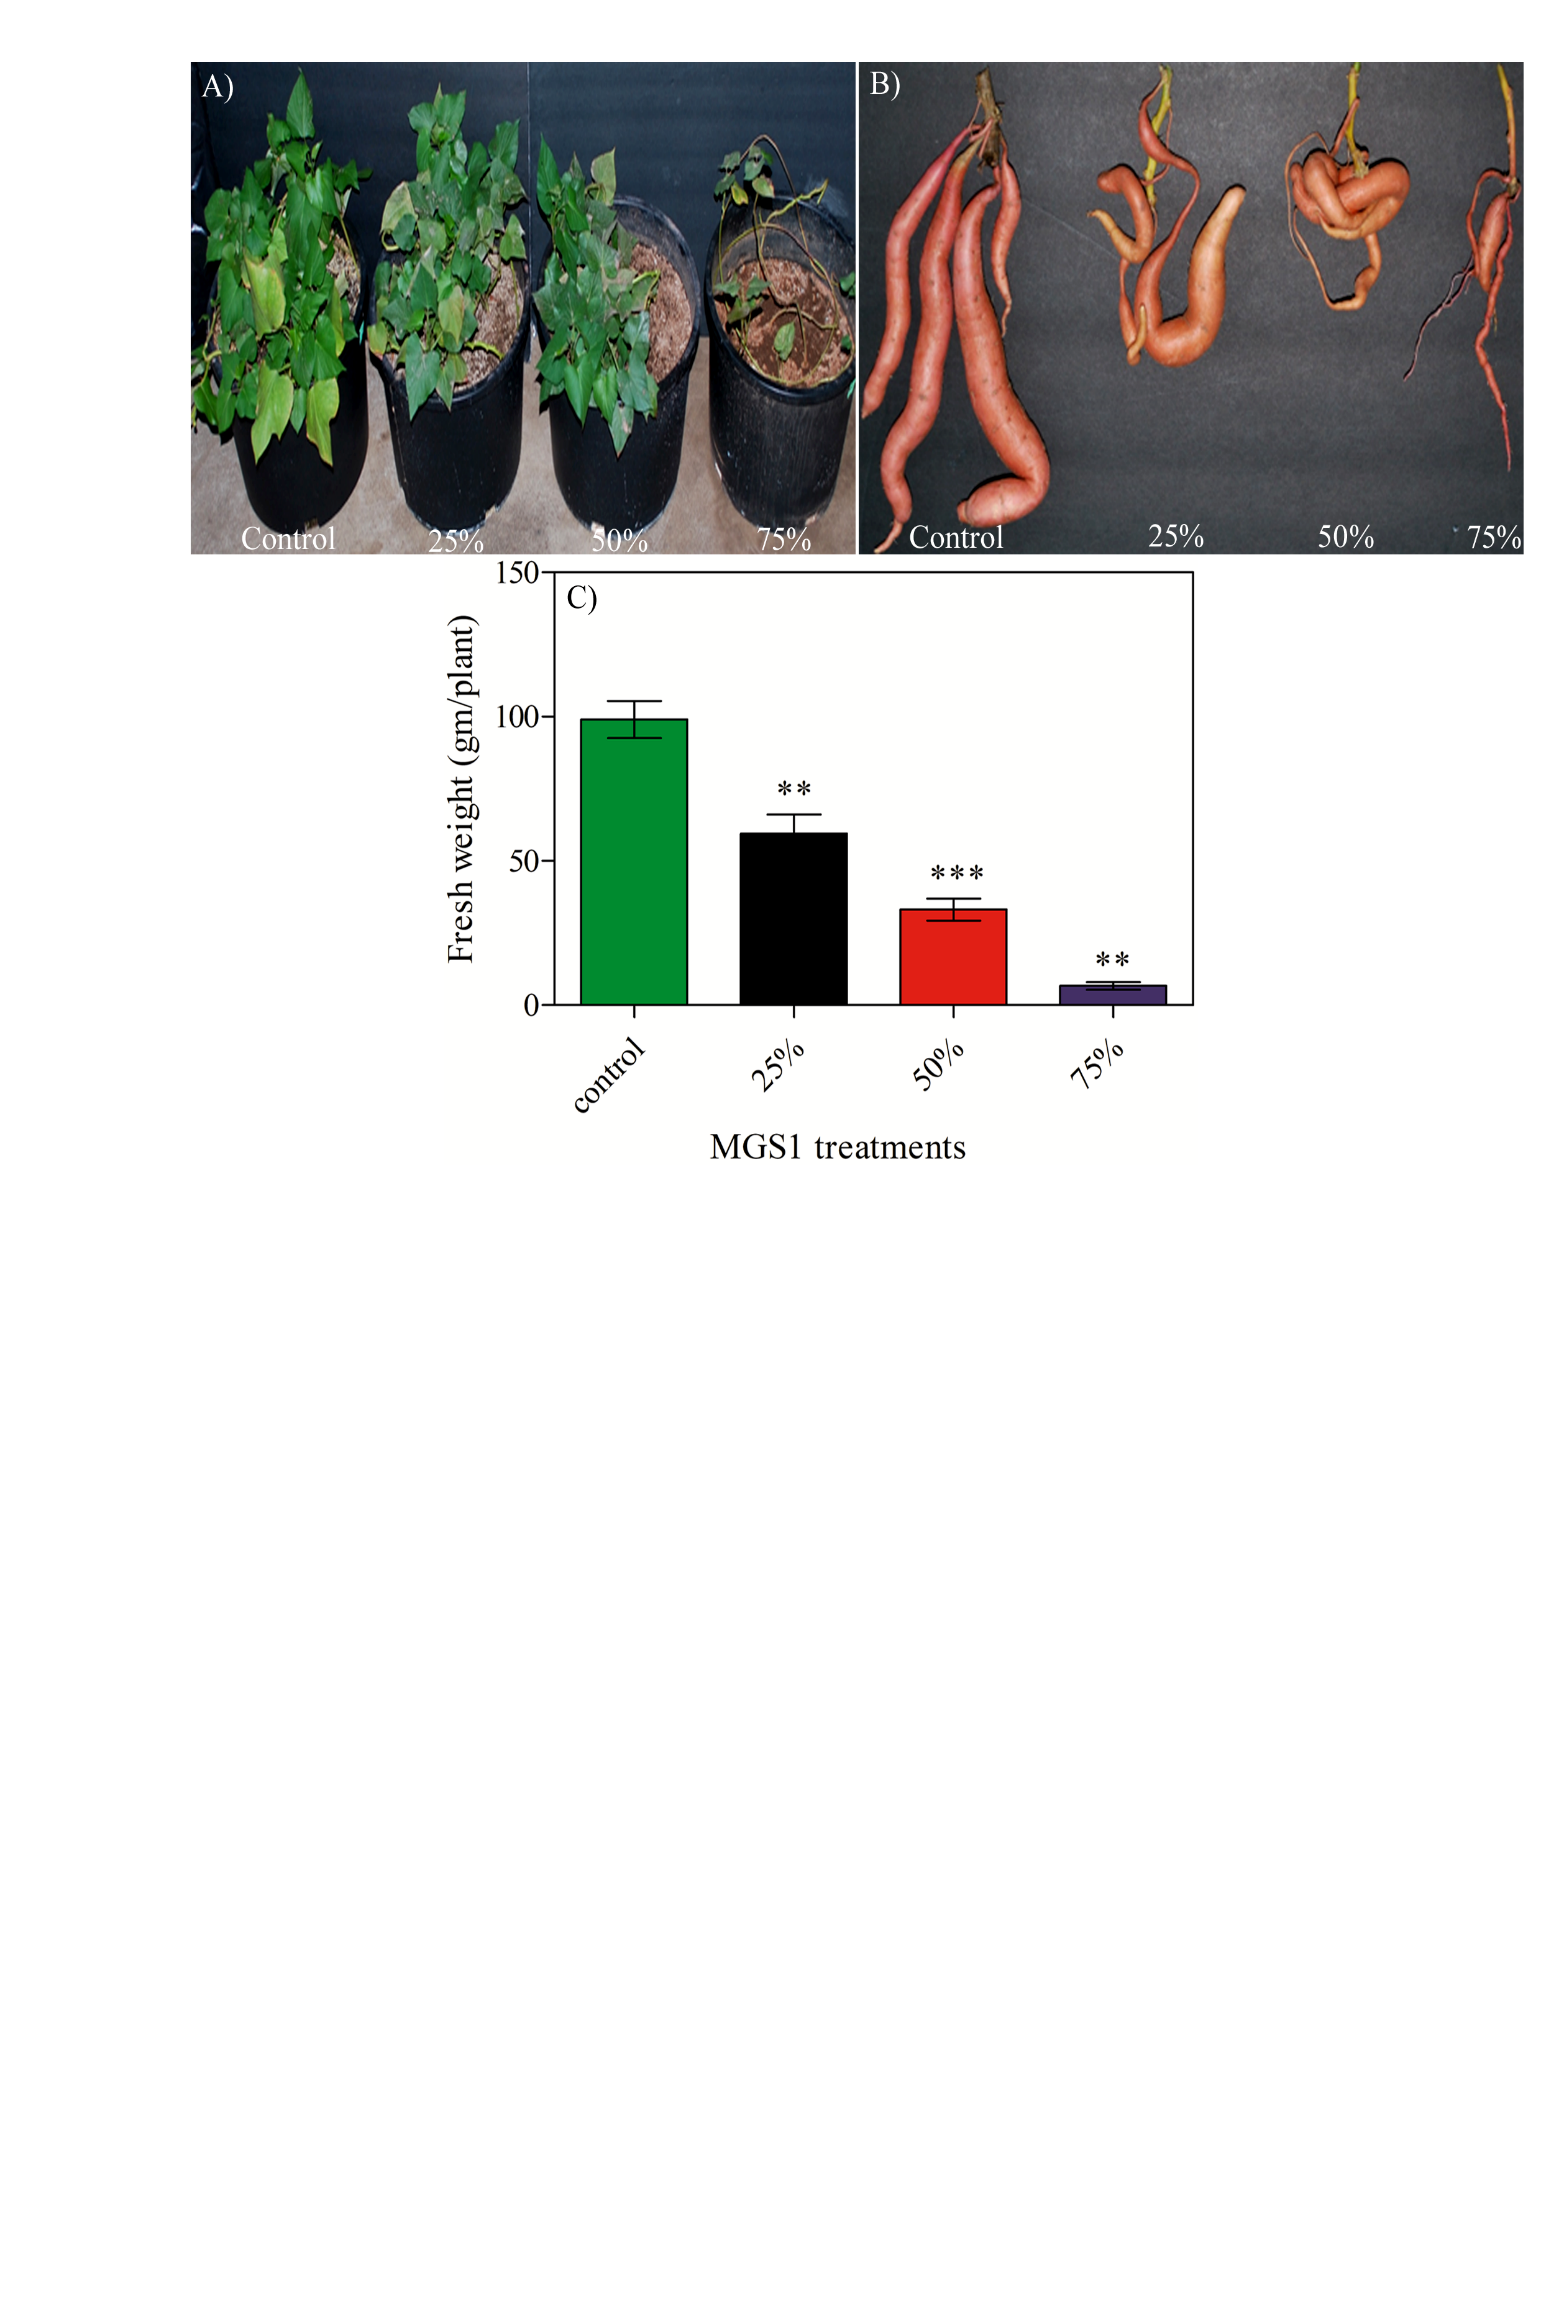


**Figure S1:** Effect of different concentrations of MGS1 exposure on A) growth and B) storage root and C) storage root fresh weight of *I. batatas*. Results are expressed as mean of triplicates ± SD. ***P* < 0.01, and ****P* < 0.001.


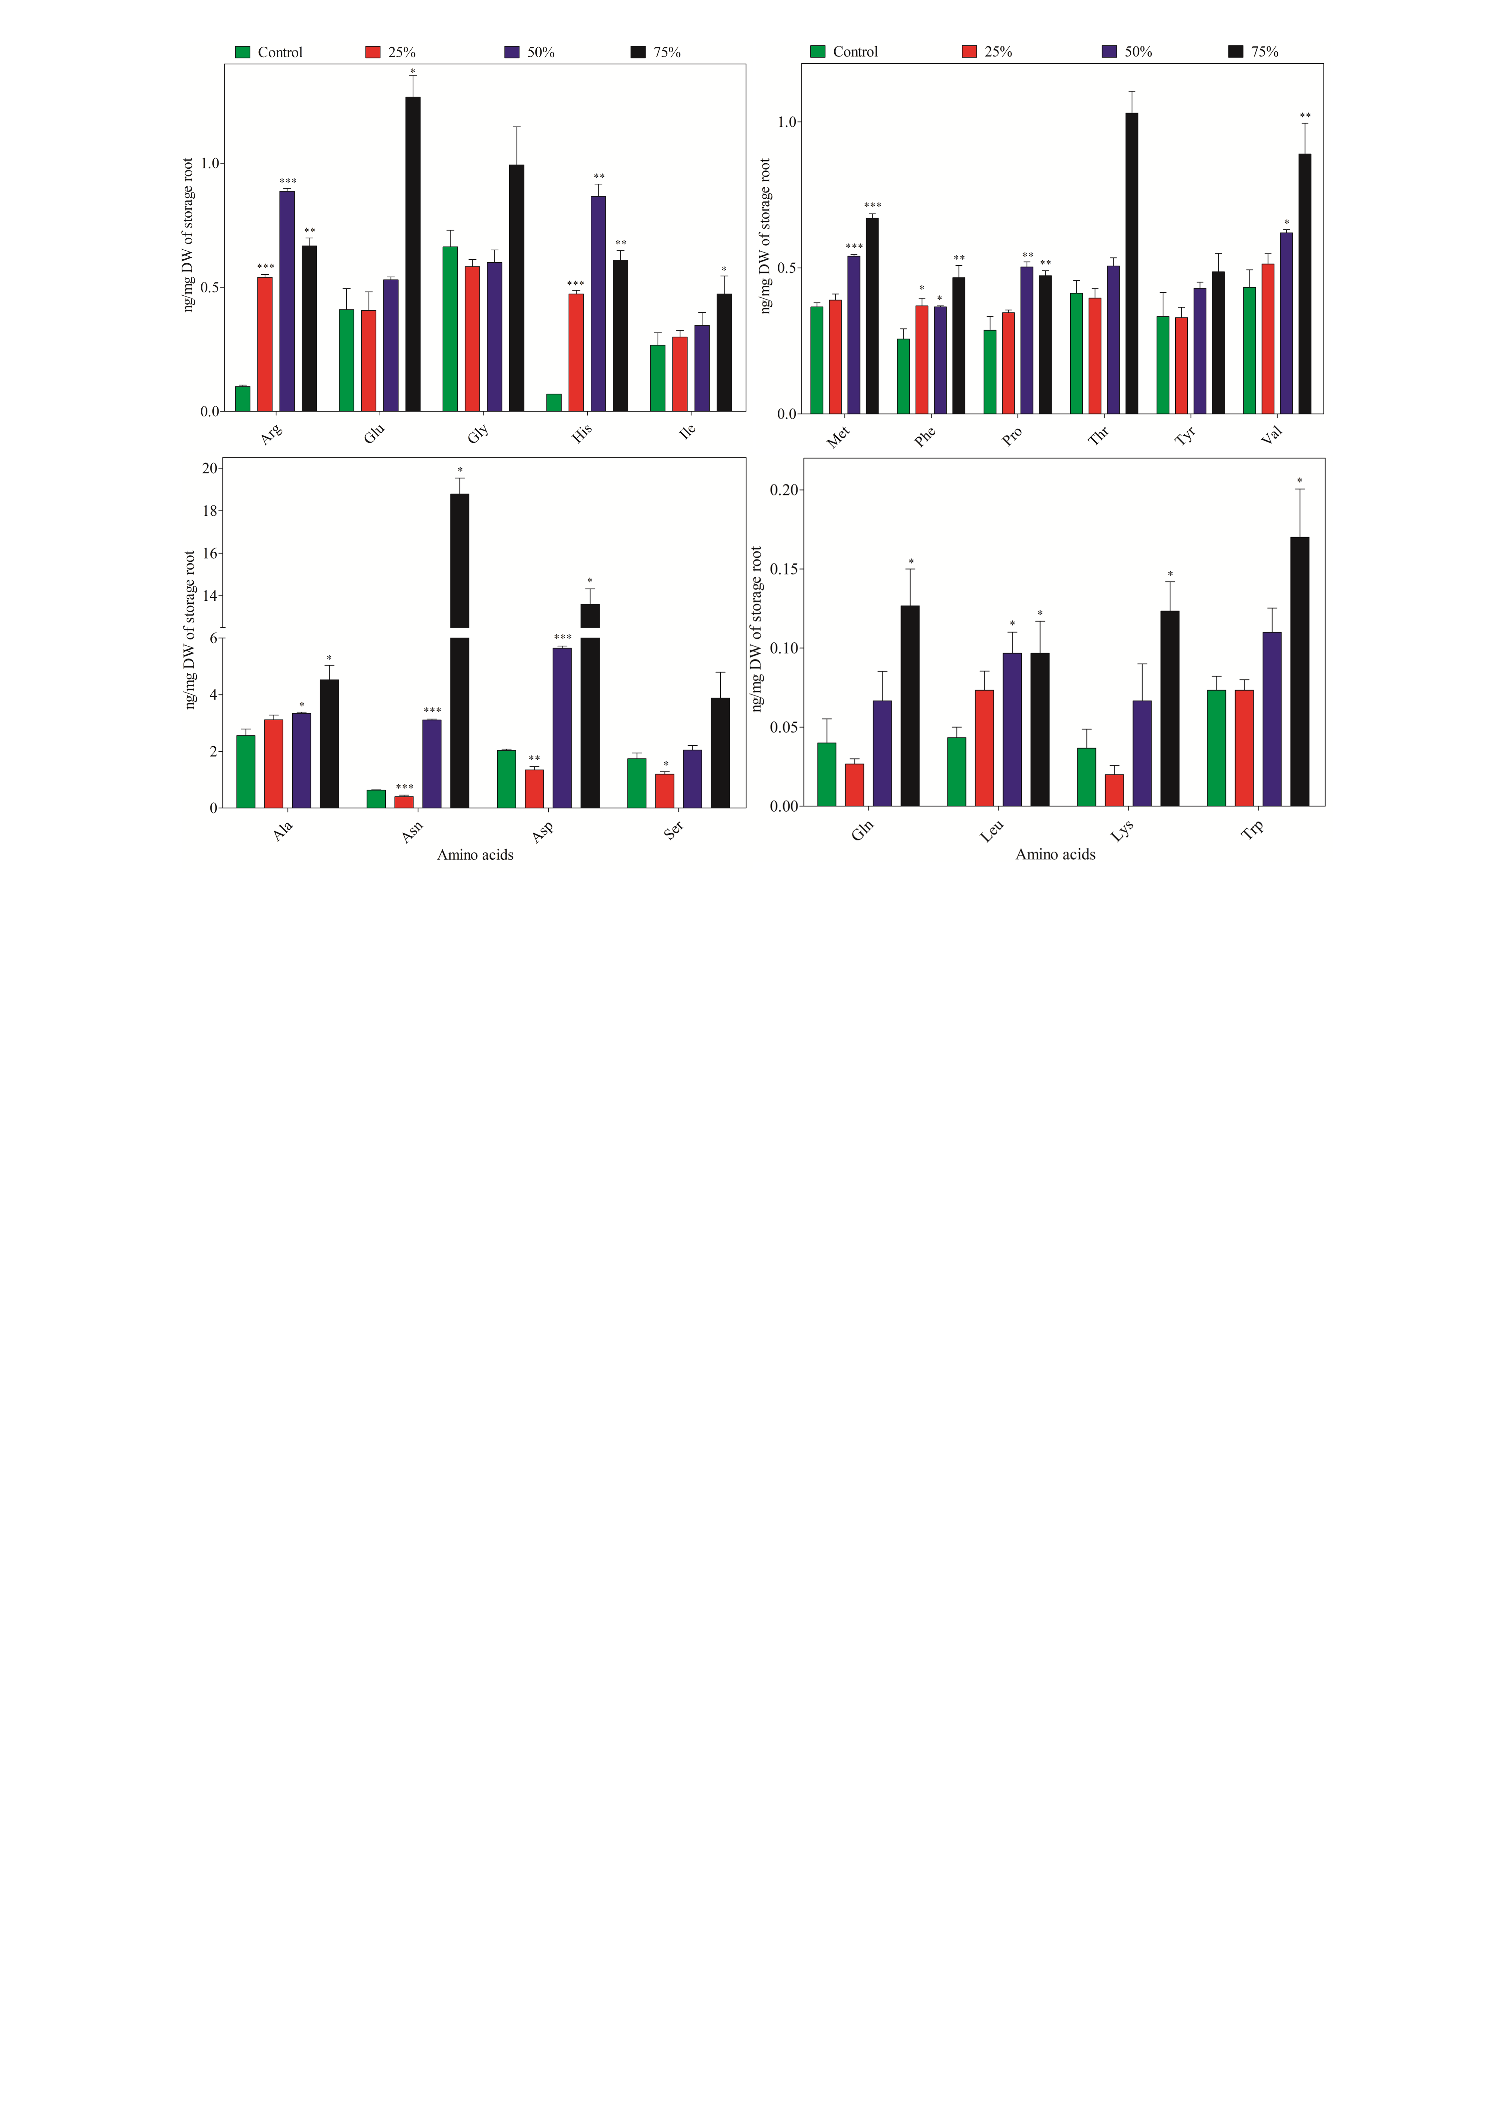


**Figure S2**: Effect of different MGS – 1 on amino acid profiling. Results are expressed as the means of three replicates ± SD and the asterisks indicate the significance at **P* < 0.05, ***P* < 0.01, and ****P* < 0.001 compared to the control according to the independent samples t test.


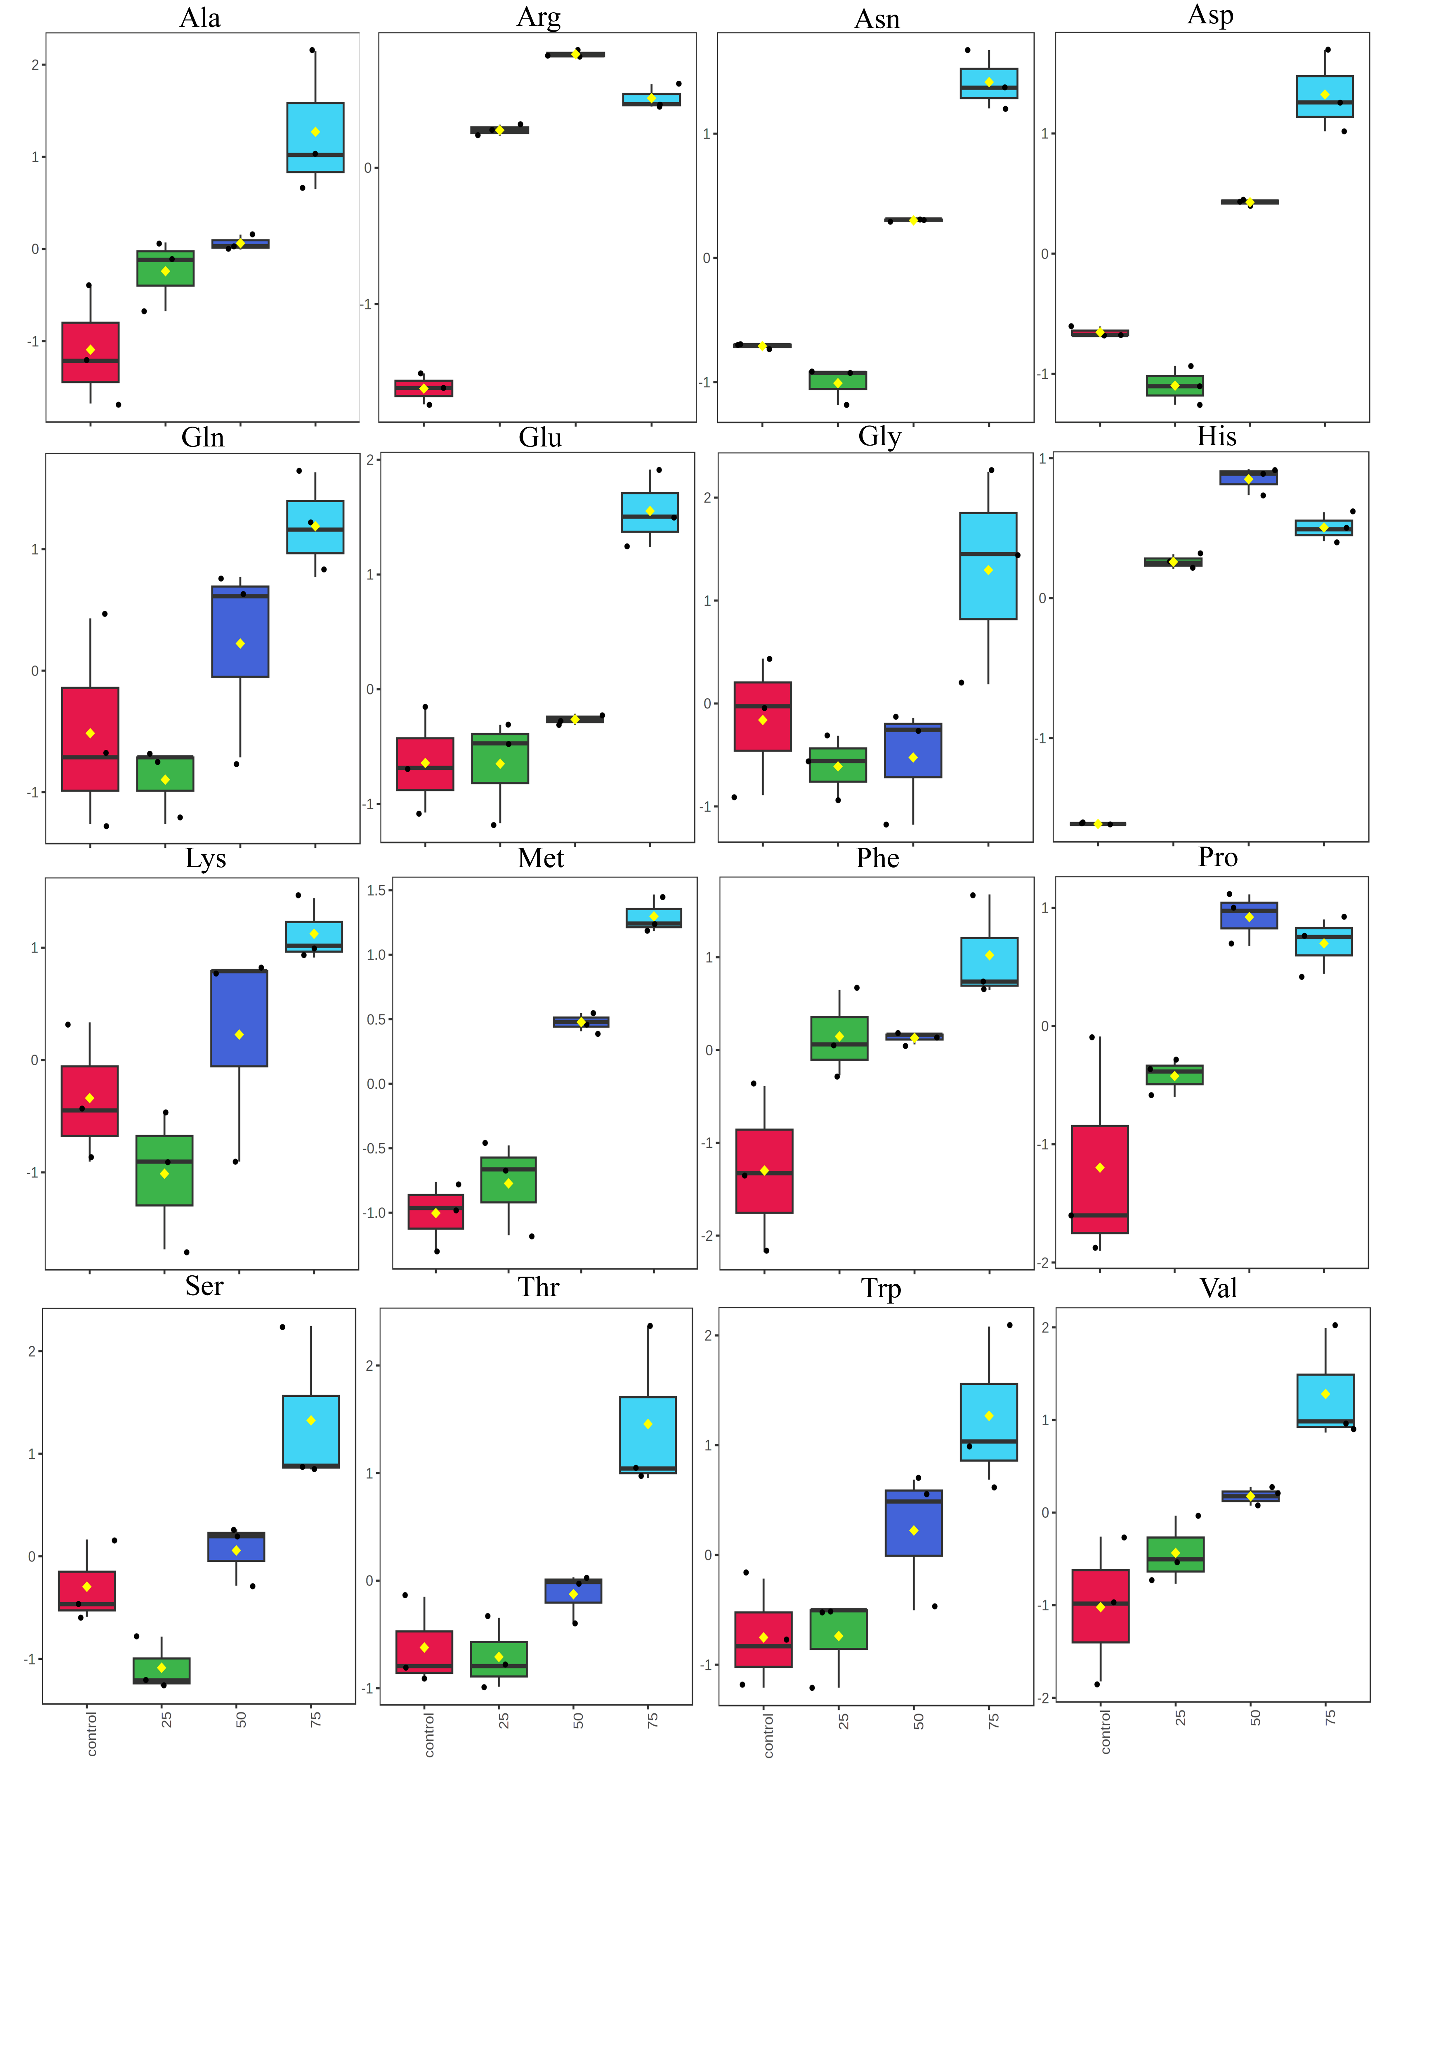


**Figure S3**: Box-Whisker plot for the significantly different amino acids for the different exposure of MGS – 1. The significantly different amino acids obtained from ANOVA and post-hoc analysis.
